# Supplementary material
Source: publisher figshare collection journal article supplement (https://acs.figshare.com/ndownloader/files/5053465)
Supplement: Supplementary file 1 [file 5053465]

# Single atom (Pd/Pt) supported on graphitic carbon nitride as efficient photocatalyst for visible-light reduction of carbon dioxide

Guoping Gao<sup>1</sup>, Yan Jiao<sup>2</sup>, Eric R. Waclawik<sup>1</sup> and Aijun Du<sup>1\*</sup>

<sup>1</sup>School of Chemistry, Physics and Mechanical Engineering, Queensland University of Technology, Garden Point Campus, QLD 4001, Brisbane, Australia

<sup>2</sup>School of Chemical Engineering, University of Adelaide, Adelaide, SA 5005, Australia

Table S1 the adsorption energy for Pt and Pd on different deposition sites of Figure 1a

| Binding sites (see Figure 1a) | E <sub>binding</sub> for Pd/g-C <sub>3</sub> N <sub>4</sub> (eV) | E <sub>binding</sub> for Pt/g-C <sub>3</sub> N <sub>4</sub> (eV) |
|-------------------------------|------------------------------------------------------------------|------------------------------------------------------------------|
| 1                             | -2.17                                                            | -2.95                                                            |
| 2                             | Move to position 1                                               | Move to position 1                                               |
| 3                             | Move to position 1                                               | Move to position 1                                               |
| 4                             | -1.36                                                            | -2.05                                                            |
| 5                             | Move to position 4                                               | -1.29                                                            |

The binding energy of metal atom on g-C<sub>3</sub>N<sub>4</sub> is calculate by eq(1)

$$E_{\text{binding}} = E_{\text{M/g-C}_3\text{N}_4} - E_{\text{M}} - E_{\text{g-C}_3\text{N}_4} \quad (1)$$

Where  $E_{\text{M/g-C}_3\text{N}_4}$ ,  $E_{\text{M}}$ , and  $E_{\text{g-C}_3\text{N}_4}$  is the total energies of single metal atom binded on the g-C<sub>3</sub>N<sub>4</sub>, single metal atom, and g-C<sub>3</sub>N<sub>4</sub>, respectively.

## Formation of HCOOH

The pathway of formation HCOOH on Pd/g-C<sub>3</sub>N<sub>4</sub>, Pt/g-C<sub>3</sub>N<sub>4</sub> and Cu/g-C<sub>3</sub>N<sub>4</sub> are the same.

The overall formula of Formation of HCOOH can be written as:

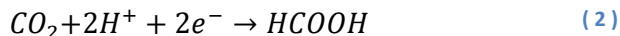

Which is divided into two element steps:

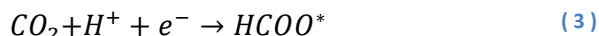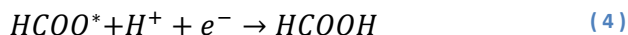

## Formation of CH<sub>3</sub>OH

The overall formula of formation of CH<sub>3</sub>OH can be written

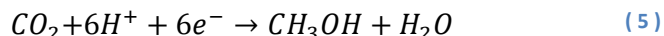

The pathway of CH<sub>3</sub>OH formation on Pd/g-C<sub>3</sub>N<sub>4</sub>, and Pt/g-C<sub>3</sub>N<sub>4</sub> is the same, but different from that on Cu/g-C<sub>3</sub>N<sub>4</sub>. On the Pd/g-C<sub>3</sub>N<sub>4</sub>, and Pt/g-C<sub>3</sub>N<sub>4</sub>, the pathway following these six element steps:

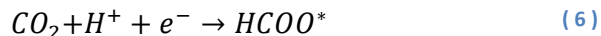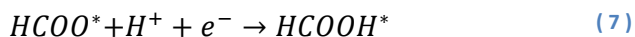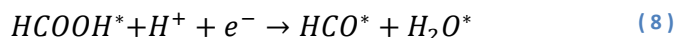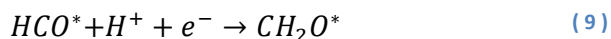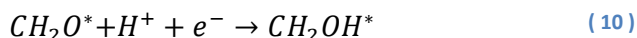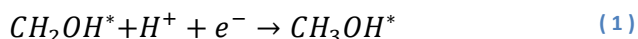

The details of pathway of CH<sub>3</sub>OH on Cu/g-C<sub>3</sub>N<sub>4</sub> are:

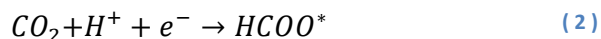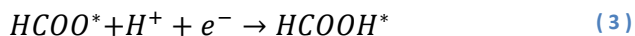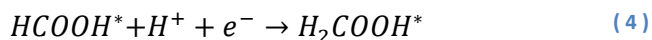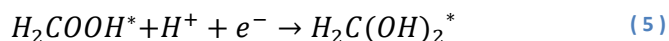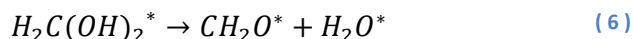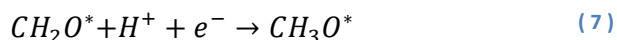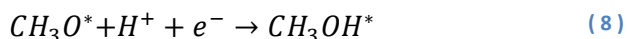

## Formation of CH<sub>4</sub>

The overall formula of formation of CH<sub>4</sub> can be written as:

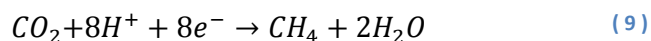

Which is only investigated on Pt/g-C<sub>3</sub>N<sub>4</sub>, and processes through eight element steps:

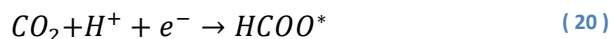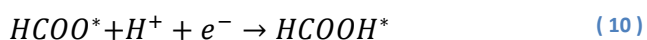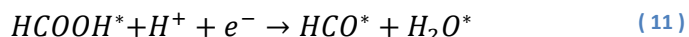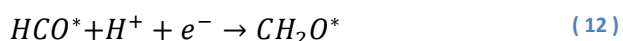

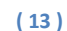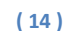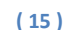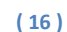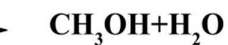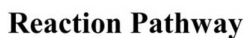

**Figure S1** The reaction pathway for CO<sub>2</sub> reduction to HCOOH and CH<sub>3</sub>OH on Cu/g-C<sub>3</sub>N<sub>4</sub>. Under standard conditions (pH=0, p(H<sub>2</sub>)=1 bar, U=0 V<sub>SH</sub>), the total energies of  $H^+(aq) + e^-$  and  $\frac{1}{2} H_2(g)$  are equal. The reference energy ( the total free energy of catalyst, isolated CO<sub>2</sub> and three H<sub>2</sub>) is set to zero. The important intermediates and products are shown as well. The substrate is displayed partly in stick model. The colour codes for the catalyst and small molecules: Copper, orange; Carbon, grey; Oxygen, red; and hydrogen, white.
